# Supplementary material
Source: Royal Society of Chemistry journal article supplement (doi:10.1039/d6gc01852a)
Supplement: d6gc01852a1.pdf [file d6gc01852a1.pdf]

**ELECTRONIC SUPPLEMENTARY INFORMATION**

## Table of Contents:

|                                                                                                                                                              |       |
|--------------------------------------------------------------------------------------------------------------------------------------------------------------|-------|
| 1. General Remarks.....                                                                                                                                      | ESI-2 |
| 2. Solvent list ordered by $\Omega$ value for Benign Index (BI) considering GWP, BAP, BCP, INHTP, INGTP, SFP, CPP.....                                       | ESI-3 |
| 3. Solvent list ordered by $\Omega$ value for Benign Index (BI) grouped by color (green, yellow, red) and sub-grouped by rank number (1-13).....             | ESI-4 |
| 4. Solvent list ordered by $\Omega$ value for Safety and Hazard Index (SHI) considering FP, CGP, CLP, OELP, RPP.....                                         | ESI-5 |
| 5. Solvent list ordered by $\Omega$ value for Safety and Hazard Index (SHI) grouped by color (green, yellow, red) and sub-grouped by rank number (1-13)..... | ESI-6 |
| 6. Solvent list ordered by rank value as sum of Safety and Hazard Index (SHI) rank and Benign Index (BI) rank grouped by color (green, yellow, red).....     | ESI-7 |
| 7. Equations used for E-factor, RME and STY and experimental boundaries considerations.....                                                                  | ESI-8 |
| 8. References.....                                                                                                                                           | ESI-9 |

## 1. General Remarks:

The 36 solvents were selected by combining two criteria: 1) the inclusion of all solvents necessary for discussing the API examples presented in the text, and 2) the inclusion of solvents already listed in the CHEM21 solvent selection guide. The solvents (present in the CHEM21 list) that were omitted were excluded because certain fundamental information required for calculating the indices, such as the Henry's law constant or toxicity data, was unavailable.

The aggregated BI/SHI values are not weighted by the quantity of solvent used. The reported values represent the sum (Andraos's  $\Omega$ ) of the various indices, considering both environmental (BAP, BCP, INHTP, INGTP, GWP, SFP, CPP) and safety/hazard (FP, CGP, CLP, OELP, RPP) potentials. The decision to decouple the solvent quantity stems from the fact that comparing batch and flow processes often involves very different reaction scales and volumes. Therefore, our goal is to provide a quantification based on the intrinsic environmental, safety, and hazard impact.

Consequently, the interpretation of the final values for multi-step syntheses should be considered as weighted by the number of different solvents utilized, rather than by the relative total quantity of solvent.

The calculation and normalization of the solvent metrics were performed through the following workflow (see Sections 2–6):

1. Solvent Ranking: The  $\Omega$  values were calculated for the defined set of 36 solvents. These solvents were displayed in ascending order based on their  $\Omega$  values and divided into three broad tertiles (12 solvents per group) to map general solvent performance.

2. Normalization: To generate the numerical scale, water (ordered 1st) was established as the ideal baseline and assigned a score of 1. The remaining solvents were then sequentially grouped into bins of three along the ordered list, with the score increasing by 1 for each subsequent bin. Specifically, solvents in positions 2–4 received a score of 2, positions 5–7 received a score of 3, and so forth, up to the final two solvents (positions 35 and 36), which both received a maximum score of 13.

3. Application to Case Studies: For each synthetic example analyzed in the main text, the specific solvents used in both the reaction and work-up phases were recorded. The corresponding normalized BI and SHI scores for these solvents were then applied.

4. Aggregation: The BI and SHI scores across all steps of a given synthesis were summed independently. These separate totals represent the final BI and SHI metrics shown in the graphical outputs of the main text. Finally, as presented in Table 1, the cumulative BI and SHI scores for each example were added together to yield a single, overall aggregate score (BI + SHI).

**2. Solvent list ordered by  $\Omega$  value for Benign Index (BI) considering GWP, BAP, BCP, INHTP, INGTP, SFP, CPP**

|                      | BI       |
|----------------------|----------|
| 1 water              | 4.832319 |
| 2 DEC                | 5.00656  |
| 3 EtOAc              | 6.766969 |
| 4 CPME               | 7.584528 |
| 5 Et <sub>2</sub> O  | 8.517349 |
| 6 Toluene            | 9.214792 |
| 7 DMSO               | 9.906033 |
| 8 DCM                | 10.39511 |
| 9 DME                | 10.82026 |
| 10 Cyclohexane       | 14.11057 |
| 11 Chloroform        | 17.37096 |
| 12 DMA               | 17.86752 |
| 13 2-MeTHF           | 21.82315 |
| 14 NMP               | 21.9607  |
| 15 EtOH              | 23.90467 |
| 16 IpOH              | 24.78137 |
| 17 Hexane            | 26.46306 |
| 18 Acetone           | 27.71469 |
| 19 <sup>t</sup> BuOH | 32.80135 |
| 20 THF               | 33.0971  |
| 21 DMF               | 40.06585 |
| 22 AcOH              | 40.97836 |
| 23 MeOH              | 41.49365 |
| 24 BuOAc             | 49.45761 |
| 25 ACN               | 49.58848 |
| 26 MTBE              | 58.65339 |
| 27 Propanol          | 64.41618 |
| 28 Nitromethane      | 94.29384 |
| 29 <i>n</i> BuOH     | 117.7983 |
| 30 Heptane           | 118.3417 |
| 31 Formic Acid       | 234.1125 |
| 32 TFE               | 384.2374 |
| 33 HCl               | 400.4764 |
| 34 DCE               | 762.83   |
| 35 Dioxane           | 1177.002 |
| 36 Pyridine          | 4622.881 |

**3. Solvent list ordered by  $\Omega$  value for Benign Index (BI) grouped by color (green, yellow, red) and sub-grouped by rank number (1-13)**

|    | BI                |          |    |
|----|-------------------|----------|----|
| 1  | water             | 4.832319 | 1  |
| 2  | DEC               | 5.00656  | 2  |
| 3  | EtOAc             | 6.766969 | 2  |
| 4  | CPME              | 7.584528 | 2  |
| 5  | Et <sub>2</sub> O | 8.517349 | 3  |
| 6  | Toluene           | 9.214792 | 3  |
| 7  | DMSO              | 9.906033 | 3  |
| 8  | DCM               | 10.39511 | 4  |
| 9  | DME               | 10.82026 | 4  |
| 10 | Cyclohexane       | 14.11057 | 4  |
| 11 | Chloroform        | 17.37096 | 5  |
| 12 | DMA               | 17.86752 | 5  |
| 13 | 2-MeTHF           | 21.82315 | 5  |
| 14 | NMP               | 21.9607  | 6  |
| 15 | EtOH              | 23.90467 | 6  |
| 16 | IpOH              | 24.78137 | 6  |
| 17 | Hexane            | 26.46306 | 7  |
| 18 | Acetone           | 27.71469 | 7  |
| 19 | <sup>t</sup> BuOH | 32.80135 | 7  |
| 20 | THF               | 33.0971  | 8  |
| 21 | DMF               | 40.06585 | 8  |
| 22 | AcOH              | 40.97836 | 8  |
| 23 | MeOH              | 41.49365 | 9  |
| 24 | BuOAc             | 49.45761 | 9  |
| 25 | ACN               | 49.58848 | 9  |
| 26 | MTBE              | 58.65339 | 10 |
| 27 | Propanol          | 64.41618 | 10 |
| 28 | Nitromethane      | 94.29384 | 10 |
| 29 | <i>n</i> BuOH     | 117.7983 | 11 |
| 30 | Heptane           | 118.3417 | 11 |
| 31 | Formic Acid       | 234.1125 | 11 |
| 32 | TFE               | 384.2374 | 12 |
| 33 | HCl               | 400.4764 | 12 |
| 34 | DCE               | 762.83   | 12 |
| 35 | Dioxane           | 1177.002 | 13 |
| 36 | Pyridine          | 4622.881 | 13 |

**4. Solvent list ordered by  $\Omega$  value for Safety and Hazard Index (SHI) considering FP, CGP, CLP, OELP, RPP**

|                      | SHI      |
|----------------------|----------|
| 1 water              | 0.007067 |
| 2 DMSO               | 1.162461 |
| 3 EtOH               | 1.536533 |
| 4 DEC                | 1.709431 |
| 5 DME                | 1.958211 |
| 6 Heptane            | 1.976973 |
| 7 EtOAc              | 2.230841 |
| 8 Acetone            | 2.337288 |
| 9 Cyclohexane        | 2.43307  |
| 10 IpOH              | 2.446678 |
| 11 MTBE              | 2.641472 |
| 12 Propanol          | 3.175206 |
| 13 Et <sub>2</sub> O | 3.275441 |
| 14 THF               | 3.312572 |
| 15 CPME              | 3.345011 |
| 16 <sup>t</sup> BuOH | 3.53953  |
| 17 BuOAc             | 3.563165 |
| 18 MeOH              | 3.770748 |
| 19 <i>n</i> BuOH     | 3.938655 |
| 20 2-MeTHF           | 4.228783 |
| 21 DCM               | 4.362703 |
| 22 Toluene           | 4.842132 |
| 23 NMP               | 5.254519 |
| 24 Hexane            | 5.393727 |
| 25 ACN               | 7.179491 |
| 26 Nitromethane      | 7.76704  |
| 27 TFE               | 9.038474 |
| 28 AcOH              | 12.04108 |
| 29 DMF               | 12.60752 |
| 30 DMA               | 13.49476 |
| 31 DCE               | 14.4921  |
| 32 Pyridine          | 22.61473 |
| 33 Formic Acid       | 24.6435  |
| 34 Dioxane           | 30.32521 |
| 35 Chloroform        | 52.2277  |
| 36 HCl               | 55.01152 |

**5. Solvent list ordered by  $\Omega$  value for Safety and Hazard Index (SHI) grouped by color (green, yellow, red) and sub-grouped by rank number (1-13)**

|    |                   | SHI      |                                                                                     |                                                                                    |
|----|-------------------|----------|-------------------------------------------------------------------------------------|------------------------------------------------------------------------------------|
| 1  | water             | 0.007067 | 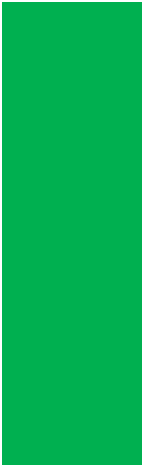   | 1                                                                                  |
| 2  | DMSO              | 1.162461 |                                                                                     | 2                                                                                  |
| 3  | EtOH              | 1.536533 |                                                                                     | 2                                                                                  |
| 4  | DEC               | 1.709431 |                                                                                     | 2                                                                                  |
| 5  | DME               | 1.958211 |                                                                                     | 3                                                                                  |
| 6  | Heptane           | 1.976973 |                                                                                     | 3                                                                                  |
| 7  | EtOAc             | 2.230841 |                                                                                     | 3                                                                                  |
| 8  | Acetone           | 2.337288 |                                                                                     | 4                                                                                  |
| 9  | Cyclohexane       | 2.43307  |                                                                                     | 4                                                                                  |
| 10 | IpOH              | 2.446678 |                                                                                     | 4                                                                                  |
| 11 | MTBE              | 2.641472 |                                                                                     | 5                                                                                  |
| 12 | Propanol          | 3.175206 |                                                                                     | 5                                                                                  |
| 13 | Et <sub>2</sub> O | 3.275441 |                                                                                     |  |
| 14 | THF               | 3.312572 | 6                                                                                   |                                                                                    |
| 15 | CPME              | 3.345011 | 6                                                                                   |                                                                                    |
| 16 | <sup>t</sup> BuOH | 3.53953  | 6                                                                                   |                                                                                    |
| 17 | BuOAc             | 3.563165 | 7                                                                                   |                                                                                    |
| 18 | MeOH              | 3.770748 | 7                                                                                   |                                                                                    |
| 19 | <i>n</i> BuOH     | 3.938655 | 7                                                                                   |                                                                                    |
| 20 | 2-MeTHF           | 4.228783 | 8                                                                                   |                                                                                    |
| 21 | DCM               | 4.362703 | 8                                                                                   |                                                                                    |
| 22 | Toluene           | 4.842132 | 8                                                                                   |                                                                                    |
| 23 | NMP               | 5.254519 | 9                                                                                   |                                                                                    |
| 24 | Hexane            | 5.393727 | 9                                                                                   |                                                                                    |
| 25 | ACN               | 7.179491 |  | 9                                                                                  |
| 26 | Nitromethane      | 7.76704  |                                                                                     | 10                                                                                 |
| 27 | TFE               | 9.038474 |                                                                                     | 10                                                                                 |
| 28 | AcOH              | 12.04108 |                                                                                     | 10                                                                                 |
| 29 | DMF               | 12.60752 |                                                                                     | 11                                                                                 |
| 30 | DMA               | 13.49476 |                                                                                     | 11                                                                                 |
| 31 | DCE               | 14.4921  |                                                                                     | 11                                                                                 |
| 32 | Pyridine          | 22.61473 |                                                                                     | 12                                                                                 |
| 33 | Formic Acid       | 24.6435  |                                                                                     | 12                                                                                 |
| 34 | Dioxane           | 30.32521 |                                                                                     | 12                                                                                 |
| 35 | Chloroform        | 52.2277  |                                                                                     | 13                                                                                 |
| 36 | HCl               | 55.01152 | 13                                                                                  |                                                                                    |

**6. Solvent list ordered by rank value as sum of Safety and Hazard Index (SHI) rank and Benign Index (BI) rank grouped by color (green, yellow, red)**

|    |                   |    |        |
|----|-------------------|----|--------|
| 1  | Water             | 2  | Green  |
| 2  | DEC               | 4  |        |
| 3  | DMSO              | 5  |        |
| 4  | EtOAc             | 5  |        |
| 5  | DME               | 7  |        |
| 6  | EtOH              | 8  |        |
| 7  | Cyclohexane       | 8  |        |
| 8  | Et <sub>2</sub> O | 8  |        |
| 9  | CPME              | 8  |        |
| 10 | IpOH              | 10 |        |
| 11 | Acetone           | 11 |        |
| 12 | Toluene           | 11 |        |
| 13 | DCM               | 12 | Yellow |
| 14 | <sup>t</sup> BuOH | 13 |        |
| 15 | 2-MeTHF           | 13 |        |
| 16 | Heptane           | 14 |        |
| 17 | THF               | 14 |        |
| 18 | MTBE              | 15 |        |
| 19 | Propanol          | 15 |        |
| 20 | NMP               | 15 |        |
| 21 | BuOAc             | 16 |        |
| 22 | MeOH              | 16 |        |
| 23 | Hexane            | 16 |        |
| 24 | DMA               | 16 |        |
| 25 | <i>n</i> BuOH     | 18 | Red    |
| 26 | ACN               | 18 |        |
| 27 | AcOH              | 18 |        |
| 28 | Chloroform        | 18 |        |
| 29 | DMF               | 19 |        |
| 30 | Nitromethane      | 20 |        |
| 31 | TFE               | 22 |        |
| 32 | DCE               | 23 |        |
| 33 | Formic Acid       | 23 |        |
| 34 | Pyridine          | 25 |        |
| 35 | Dioxane           | 25 |        |
| 36 | HCl               | 25 |        |

## 7. Equations used for E-factor, RME and STY and experimental boundaries considerations

All the masses outlined in patents and literature procedures were used to calculate the E-factor, including water.

$$E - factor = \frac{\text{mass of all reagent and solvents} - \text{mass of product}}{\text{mass of product}}$$

Unified RME (Andraos) was regarded as having thoroughly considered mass efficiency. Specifically, the relationship between RME and E-factor is given as follows using Andraos derivatization:<sup>1</sup>

$$RME = \frac{1}{1 + E - factor} * 100$$

Since reactor size is not typically reported in some procedures, the values were estimated as twice the volume of all solvents listed for each reaction step.

$$STY = \frac{\text{mass of product}}{\text{reactor volume} * \text{reaction time}}$$

### Experimental boundaries considerations:

**Work-up solvent:** All the work-up solvents listed in the related procedure were considered throughout the calculation without any exclusions. In particular, whether saturated solutions were listed, the specific density was considered to allow an accurate description of the weight of the material used. No assumptions were made in the accounting of work-up solvents.

**Isolation solvent:** If the isolation solvent comprises a description of crystallization, precipitation, or liquid/liquid separation, all amounts stated in the reported procedure were considered without any exclusions or assumptions. Whether the isolation procedure is performed using a chromatographic column, as no quantification was reported for these solvents and the related material (stationary phases), they were not considered in the calculations.

**Incomplete information:** As we aim for a broader and more meaningful review, it is worth noting that an initial screening and consideration of the API to be treated were also based on procedures that contain as much information as possible (in terms of solvent, auxiliary, boundary materials, purification materials, reactor volumes, and reagent descriptions), excluding *a priori* patent or

literature procedures that, even if valuable, do not contain enough information to allow the desired calculations. Since reactor size is sometimes not reported in some procedures, especially for very old patent batch processes, the values were estimated (for STY calculations) as twice the volume of all solvents listed for each reaction step.

## **8. References:**

1. J. Andraos, *Org. Process Res. Dev.* 2005, **9**, 149–163. doi: 10.1021/op049803n
